# Supplementary material
Source: publisher figshare collection journal article supplement (https://acs.figshare.com/ndownloader/files/5828475)
Supplement: Supplementary file 1 [file 5828475]

# Palladium-Catalyzed Cyanation of Propargylic Carbonates with Trimethylsilyl Cyanide

Yasushi Tsuji,\* Masahiko Taniguchi, Tamami Yasuda, Takashi Kawamura, and Yasushi Obora

*Catalysis Research Center and Division of Chemistry, Graduate School of Science, Hokkaido University, Sapporo 060-0811, Japan, and Department of Chemistry, Faculty of Engineering, Gifu University, Gifu 501-1193, Japan*

## SUPPORTING INFORMATION

**Analytical Procedure.** The NMR spectra of the sample in  $\text{CDCl}_3$  were recorded on JEOL  $\alpha$ -400 spectrometer:  $^1\text{H}$  (400 MHz),  $^{13}\text{C}$  (100 MHz), and  $^{29}\text{Si}$  (79.4 MHz). The mass (GCMS) spectra were measured with Shimadzu QP-1000 equipped with a PAC 1100S computer system. The GC analysis was made on a Shimadzu GC-8APF with a column (3 mm i.d.  $\times$  3 m) packed with Silicon OV-17 (2% on Uniport HP, 60/80 mesh) or Apiezon Grease L (5% on Uniport HP, 60/80 mesh). Elemental analysis was performed at the Microanalytical Center of Kyoto University.

**Cyanation of propargylic carbonate (1) with 1 equiv of trimethylsilyl cyanide (2) (eq 1 and Table 1).** A typical procedure is described for the cyanation of **1a** (entry 1). A mixture of **1a** (226 mg, 1.0 mmol), **2** (99 mg, 1.0 mmol),  $\text{Pd}(\text{PPh}_3)_4$  (58 mg, 0.050 mmol), and THF (4.0 mL) was placed under argon atmosphere in a 20 mL flask equipped with a three-way stopcock. The reaction was carried out under reflux for 1 h. After the reaction, the resulting reaction mixture was passed through a short Florisil column (8 mm i.d.  $\times$  70 mm) to give a almost colorless (or slightly yellow) solution. Kugelrohr distillation (pot temp 90-100  $^\circ\text{C}$  / 0.1 mmHg) provided **3a** (161 mg) in 91% yield as colorless liquid.

**Cyanation of 1 with excess 2 (Table 2, eq 3, and eq 5).** A typical procedure is as follows (entry 9): A 20 mL flask was charged with **1h** (212 mg, 1.0 mmol), **2** (595 mg, 6.0 mmol),  $\text{Pd}(\text{PPh}_3)_4$  (58 mg, 0.050 mmol), and THF (4.0 mL) under argon atmosphere. The reaction was carried out under reflux for 20 h. After the reaction, the

resulting reaction mixture was passed through a short Florisil column (8 mm i.d.  $\times$  70 mm) to afford a pale yellow solution. Kugelrohr distillation (pot temp 90 °C / 0.04 mmHg) afforded (Z)-**7a** (199 mg) in 80% yield as colorless liquid.

**Reaction of cyanoallene (3) with excess 2 (eq 4 and eq 6).** The following reaction shows a typical procedure (eq 4). A mixture of **3g** (149 mg, 1.0 mmol), **2** (496 mg, 5.0 mmol), Pd(PPh<sub>3</sub>)<sub>4</sub> (58 mg, 0.050 mmol), and THF (4.0 mL) was stirred under argon atmosphere at 70 °C for 20 h. GC analysis of the reaction mixture with the internal standard method showed (Z)-**7a** was afforded in 93% yield.

**3a:** <sup>1</sup>H NMR  $\delta$  0.85 (t,  $J$  = 6.8 Hz, 3H), 1.19-1.34 (m, 6H), 1.45 (quin,  $J$  = 7.2 Hz, 2H), 1.73 (s, 6H), 2.09 (t,  $J$  = 7.2 Hz, 2H); <sup>13</sup>C NMR  $\delta$  13.89 (CH<sub>3</sub>), 19.53 (CH<sub>3</sub>), 22.44 (CH<sub>2</sub>), 27.42 (CH<sub>2</sub>), 28.08(CH<sub>2</sub>), 31.33 (CH<sub>2</sub>), 31.46 (CH<sub>2</sub>), 79.62 (C), 101.60 (C), 116.52 (C), 209.11 (C); MS  $m/z$  = 177 (M<sup>+</sup>).

**3b:** <sup>1</sup>H NMR  $\delta$  0.88 (d,  $J$  = 6.4 Hz, 6H), 1.30–1.47 (m, 1H), 1.58 (q,  $J$  = 7.1 Hz, 2H), 1.75 (s, 6H), 2.12 (t,  $J$  = 7.1 Hz, 2H); <sup>13</sup>C NMR  $\delta$  19.64 (CH<sub>3</sub>), 22.26 (CH<sub>3</sub>), 27.01 (CH<sub>2</sub>), 29.57 (CH), 36.51 (CH<sub>2</sub>), 79.78 (C), 101.76 (C), 117.90 (C), 209.01 (C). Anal. Calcd for C<sub>11</sub>H<sub>17</sub>N: C, 80.93; H, 10.50. Found: C, 81.14; H, 10.73.

**3c:** <sup>1</sup>H NMR  $\delta$  0.89 (t,  $J$  = 7.3 Hz, 3H), 1.00 (t,  $J$  = 7.4 Hz, 3H), 1.33 (sex,  $J$  = 7.3 Hz, 2H), 1.45 (quin,  $J$  = 7.3 Hz, 2H), 1.74 (s, 3H), 2.02 (q,  $J$  = 7.4 Hz, 2H), 2.12 (t,  $J$  = 7.3 Hz, 2H); <sup>13</sup>C NMR  $\delta$  11.78 (CH<sub>3</sub>), 13.67 (CH<sub>3</sub>), 18.15 (CH<sub>2</sub>), 21.67 (CH<sub>3</sub>), 21.68 (CH<sub>2</sub>), 29.74 (CH<sub>2</sub>), 31.32 (CH<sub>2</sub>), 81.50 (C), 107.98 (C), 116.79 (C), 208.67 (C). Anal. Calcd for C<sub>11</sub>H<sub>17</sub>N: C, 80.93; H, 10.50. Found: C, 81.04; H, 10.68.

**3d:** <sup>1</sup>H NMR  $\delta$  0.85 (t,  $J$  = 7.0 Hz, 3H), 1.00 (t,  $J$  = 7.2 Hz, 3H), 1.20-1.34 (m, 6H), 1.46 (quin,  $J$  = 7.4 Hz, 2H), 1.73 (s, 3H), 2.02 (q,  $J$  = 7.2 Hz, 2H), 2.11 (t,  $J$  = 7.4 Hz, 2H); <sup>13</sup>C NMR  $\delta$  11.75 (CH<sub>3</sub>), 13.93(CH<sub>3</sub>), 18.11(CH<sub>3</sub>), 22.47(CH<sub>2</sub>), 26.71(CH<sub>2</sub>), 27.60(CH<sub>2</sub>), 28.21(CH<sub>2</sub>), 31.38(CH<sub>2</sub>), 31.60(CH<sub>2</sub>), 81.55(C), 107.93(C), 116.72(C), 208.65(C). Anal. Calcd for C<sub>13</sub>H<sub>21</sub>N: C, 81.62; H, 11.06. Found: C, 81.48; H, 11.28.

**3e:** <sup>1</sup>H NMR  $\delta$  0.89 (d,  $J$  = 6.4 Hz, 6H), 1.73 (d,  $J$  = 2.8 Hz, 3H), 1.73 (m, 1H), 1.90 (dd,  $J$  = 7.2 Hz, 2.8 Hz, 2H), 5.06 (sex,  $J$  = 2.8 Hz, 1H); <sup>13</sup>C NMR  $\delta$  17.60 (CH<sub>3</sub>), 22.20 (CH<sub>3</sub>), 26.08 (CH), 42.27 (CH<sub>2</sub>), 65.49 (CH), 105.12 (C), 114.22 (C), 213.64 (C). Anal. Calcd for C<sub>9</sub>H<sub>13</sub>N: C, 79.95; H, 9.69. Found: C, 80.24; H, 9.88.

**3f:**  $^1\text{H}$  NMR  $\delta$  0.86 (t,  $J = 7.4$  Hz, 3H), 1.24–1.52 (m, 8H), 1.73 (d,  $J = 7.6$  Hz, 3H), 2.14 (td,  $J = 7.4$  Hz, 2.5 Hz, 2H), 5.54 (qt,  $J = 7.6$  Hz, 2.5 Hz, 1H);  $^{13}\text{C}$  NMR  $\delta$  13.25 ( $\text{CH}_3$ ), 13.99 ( $\text{CH}_3$ ), 22.50 ( $\text{CH}_2$ ), 27.47 ( $\text{CH}_2$ ), 28.19 ( $\text{CH}_2$ ), 31.23 ( $\text{CH}_2$ ), 31.38 ( $\text{CH}_2$ ), 81.52 (C), 91.49 (CH), 116.10 (C), 211.75 (C); MS  $m/z = 163$  ( $\text{M}^+$ ).

**3g:**  $^1\text{H}$  NMR  $\delta$  0.86 (t,  $J = 7.0$  Hz, 3H), 1.21–1.38 (m, 6H), 1.51 (quin,  $J = 7.4$  Hz, 2H), 2.17 (tt,  $J = 7.4$  Hz, 2.9 Hz, 2H), 5.18 (t,  $J = 2.9$  Hz, 2H);  $^{13}\text{C}$  NMR  $\delta$  13.96 ( $\text{CH}_3$ ), 22.46 ( $\text{CH}_2$ ), 27.41 ( $\text{CH}_2$ ), 28.21 ( $\text{CH}_2$ ), 30.72 ( $\text{CH}_2$ ), 31.33 ( $\text{CH}_2$ ), 80.23 ( $\text{CH}_2$ ), 82.08 (C), 115.33 (C), 214.82 (C); MS  $m/z = 134$  ( $\text{M}^+ - \text{Me}$ ).

**7a:** (*Z*)-isomer:  $^1\text{H}$  NMR  $\delta$  0.14 (s, 9H), 0.86 (t,  $J = 6.8$  Hz, 3H), 1.25–1.36 (m, 6H), 1.57 (quin,  $J = 7.4$  Hz, 2H), 2.08 (s, 2H), 2.49 (t,  $J = 7.4$  Hz, 2H);  $^{13}\text{C}$  NMR  $\delta$  –1.67 ( $\text{CH}_3$ ), 13.82 ( $\text{CH}_3$ ), 22.31 ( $\text{CH}_2$ ), 26.65 ( $\text{CH}_2$ ), 28.01 ( $\text{CH}_2$ ), 28.13 ( $\text{CH}_2$ ), 31.14 ( $\text{CH}_2$ ), 33.42 ( $\text{CH}_2$ ), 116.13 (C), 116.23 (C), 124.59 (C), 127.38 (C); MS  $m/z = 248$  ( $\text{M}^+$ ). Anal. Calcd for  $\text{C}_{14}\text{H}_{24}\text{N}_2\text{Si}$ : C, 67.68; H, 9.74. Found: C, 67.95; H, 9.82. (*E*)-isomer:  $^1\text{H}$  NMR  $\delta$  0.15 (s, 9H), 1.90 (s, 2H), 2.20 (t,  $J = 7.4$  Hz, 2H);  $^{13}\text{C}$  NMR  $\delta$  –1.48 ( $\text{CH}_3$ ), 17.03 ( $\text{CH}_2$ ); MS  $m/z = 248$  ( $\text{M}^+$ ). These (*Z*) and (*E*) assignments are confirmed with NOESY and HMQC spectra.

**7b:**  $^1\text{H}$  NMR  $\delta$  0.13 (s, 9H), 0.77 (t,  $J = 7.6$  Hz, 3H), 1.21 (sex,  $J = 7.6$  Hz, 2H), 1.42 (quin,  $J = 7.6$  Hz, 2H), 1.94 (s, 2H), 2.35 (t,  $J = 7.6$  Hz, 2H);  $^{13}\text{C}$  NMR  $\delta$  –1.51 ( $\text{CH}_3$ ), 13.64 ( $\text{CH}_3$ ), 21.82 ( $\text{CH}_2$ ), 26.83 ( $\text{CH}_2$ ), 30.28 ( $\text{CH}_2$ ), 33.31 ( $\text{CH}_2$ ), 116.32 (C), 116.39 (C), 124.72 (C), 127.56 (C); MS  $m/z = 220$  ( $\text{M}^+$ ). Anal. Calcd for  $\text{C}_{12}\text{H}_{20}\text{N}_2\text{Si}$ : C, 65.40; H, 9.15. Found: C, 65.21; H, 9.32. NOESY spectrum showed the product is the (*Z*)-isomer.

**8:**  $^1\text{H}$  NMR  $\delta$  0.85 (t,  $J = 6.8$  Hz, 3H), 1.20–1.51 (m, 8H), 1.69–1.78 (m, 1H), 1.87–1.97 (m, 1H), 1.92 (s, 3H), 2.12 (s, 3H), 3.48 (t,  $J = 7.9$  Hz, 1H);  $^{13}\text{C}$  NMR  $\delta$  13.86 ( $\text{CH}_3$ ), 20.66 ( $\text{CH}_3$ ), 22.35 ( $\text{CH}_2$ ), 25.05 ( $\text{CH}_3$ ), 26.75 ( $\text{CH}_2$ ), 28.35 ( $\text{CH}_2$ ), 30.96 (CH), 31.28 ( $\text{CH}_2$ ), 31.81 ( $\text{CH}_2$ ), 105.71 (C), 115.77 (C), 118.23 (C), 157.15 (C); MS  $m/z = 204$  ( $\text{M}^+$ ). Anal. Calcd for  $\text{C}_{13}\text{H}_{20}\text{N}_2$ : C, 76.42; H, 9.87. Found: C, 76.30; H, 10.11.
